# Supplementary material for: Hodgkin lymphoma involving the extra-axial CNS: an AHOD1331, PHL-C1, and PHL-C2 report from the COG and EuroNet-PHL
Source: PubMed Central journal article supplement — Blood Adv. 2024 Jul 31;8(18):4856–65. doi: 10.1182/bloodadvances.2023012346 (PMC11416590; doi:10.1182/bloodadvances.2023012346), 2024-07-31
Supplement: BLOODA_ADV-2023-012346-mmc1.pdf [file BLOODA_ADV-2023-012346-mmc1.pdf]

**Supplementary Table 1: Presenting symptoms and location of CNS lesion.** Summary of patients with documented symptoms at time of diagnosis (pain, neurologic symptoms) and description of their CNS involvement (Th: thoracic, C: cervical, L: lumbar).

| <b>Patient</b>   | <b>Description of symptoms</b>                                                                                                                                                                                          | <b>Location of the CNS lesion</b>                                                                                                                                                                                                                                                                       |
|------------------|-------------------------------------------------------------------------------------------------------------------------------------------------------------------------------------------------------------------------|---------------------------------------------------------------------------------------------------------------------------------------------------------------------------------------------------------------------------------------------------------------------------------------------------------|
| 1<br>(2 lesions) | Sensations of coldness in the upper extremities;<br>temperature differences between right and left hand;<br>dysesthesia of both arms and muscle weakness.<br><br>Increasing numbness (belt-shaped) of the left abdomen. | Th1-3: Paraspinal soft tissue mass (left>right) extending through the neuroforamina into the spinal canal with adjacent bone destruction and infiltration of the pleural space.<br><br>Th6: Left-sided paraspinal soft tissue mass extending through the neuroforamina and affecting the pleural space. |
| 2<br>(2 lesions) | Pain in lumbar region, buttocks and legs.                                                                                                                                                                               | Th8: Paraspinal soft tissue mass on the right side, extending through the neuroforamina into the spinal canal with upward growth until Th6.<br><br>Th12: Paraspinal soft tissue mass adjacent to the collapsed vertebra extending through the left neuroforamina into the spinal canal.                 |
| 3<br>(1 lesion)  | Pain between both scapulae with dysesthesia of the posterior part of the left arm.                                                                                                                                      | Th1-4: Paraspinal soft tissue mass on the left side, which extends through the neuroforamina.                                                                                                                                                                                                           |
| 4<br>(1 lesion)  | Pain from the neck radiating into the right arm.                                                                                                                                                                        | C7-Th2: Paraspinal soft tissue mass on the right side, extending through the right neuroforamina into the spinal canal.                                                                                                                                                                                 |
| 5<br>(1 lesion)  | Back pain.                                                                                                                                                                                                              | Th7: Paraspinal soft tissue mass on the right side, extending through the neuroforamina into the spinal canal.                                                                                                                                                                                          |
| 6<br>(1 lesion)  | Neurologic symptoms in the right leg.                                                                                                                                                                                   | Th9-L1: Paraspinal soft tissue mass on both sides, extending through the neuroforamina of Th9-11 into the spinal canal, and displacing the spinal cord.                                                                                                                                                 |
| 7<br>(1 lesion)  | Worsening back pain and thoracic pain causing dyspnea and impacting sleep.                                                                                                                                              | Th5-6: Paraspinal soft tissue mass on both sides, extending through the neuroforamina into the spinal canal, and displacing the spinal cord.                                                                                                                                                            |
| 8<br>(1 lesion)  | Back pain and thoracic pain radiating into the right arm, causing dyspnea.                                                                                                                                              | C6: Paraspinal soft tissue mass on the right side, extending through the neuroforamen into the spinal canal, does not reach the spinal canal.                                                                                                                                                           |
| 9                | Back pain affecting the right hemithorax and the right flank.                                                                                                                                                           | Th12-L1: Paraspinal soft tissue mass on the right side, extending through the neuroforamina, but does not reach the spinal canal.                                                                                                                                                                       |

|                |                                         |                                                                                                                                                                                                                                                                                        |
|----------------|-----------------------------------------|----------------------------------------------------------------------------------------------------------------------------------------------------------------------------------------------------------------------------------------------------------------------------------------|
| (1 lesion)     |                                         |                                                                                                                                                                                                                                                                                        |
| 10 (1 lesion)  | Back pain and weakness of the left leg. | Sacral soft tissue mass on the left side, which infiltrates the neuroforamina and the adjacent muscles.                                                                                                                                                                                |
| 11 (2 lesions) | Back pain.                              | Th10-11: Soft tissue mass coming from both thoracic vertebra, which infiltrates the neuroforamina on the left side as well as the spinal canal.<br><br>Sacral bone: Mass from the sacral bone, which extends into the neuroforamina on the right side and grows into the spinal canal. |

**Supplementary Table 2: Literature Review**

| Number | First author | Date published | Age (years) | Sex | Clinical symptoms description                               | Length of symptoms prior to presentation (months) | Pain (0=no, 1=yes) | Neurologic symptoms (0=no, 1=yes) | Location of tumour                            | Pathology | Stage (if given) | Surgical intervention for management - does not include biopsy for diagnosis (0=no, 1=yes) | Chemotherapy (0=no, 1=yes, 999=unknown) | Chemotherapy - specify | Radiation (0=no, 1=yes, 999=unknown) | Other notes |
|--------|--------------|----------------|-------------|-----|-------------------------------------------------------------|---------------------------------------------------|--------------------|-----------------------------------|-----------------------------------------------|-----------|------------------|--------------------------------------------------------------------------------------------|-----------------------------------------|------------------------|--------------------------------------|-------------|
| 1      | Abu-Bonsrah  | 2015           | 29          | F   | 1 month lower back pain, lower extremity numbness, weakness | 1                                                 | 1                  | 1                                 | T10 vertebral body, epidural soft tissue mass | Classical |                  | 1                                                                                          | 1                                       | ABVD                   |                                      |             |

|   |          |      |    |   |                                                                                                  |    |   |   |                                                                               |                        |      |   |     |                                                                                                   |              |                                |
|---|----------|------|----|---|--------------------------------------------------------------------------------------------------|----|---|---|-------------------------------------------------------------------------------|------------------------|------|---|-----|---------------------------------------------------------------------------------------------------|--------------|--------------------------------|
| 2 | Al-Khaya | 2006 | 42 | F | 5 months bilateral hand weakness, parasthesias                                                   | 5  | 0 | 1 | left paraspinal mass with C7-T1 epidural extension, no clear bony involvement | Nodular sclerosing     |      | 0 | 1   | ABVD x 4                                                                                          | 1            |                                |
| 3 | Baron    | 2014 | 8  | M | 1 year of back pain, difficulty walking - progressed to sensory loss, urinary/fecal incontinence | 12 | 1 | 1 | Epidural space T4-6, T8-10                                                    | Nodular sclerosing     |      | 1 | 999 |                                                                                                   | 999          | Transferred care after surgery |
| 4 | Bayra    | 2021 | 9  | M | abdo/back pain, urinary incontinence, weight loss x 6 months                                     | 6  | 1 | 1 | spinal canal at T12, L5 and S1                                                | Classic                | IV B | 0 | 1   | 2x OEPA (vinc, etoposide, pred, adriamycin), 4 x COPP (cyclophos, vinc, procarbazine, prednisone) | 1            |                                |
| 5 | Caga     | 2006 | 39 | M | lumbar pain x 2 months                                                                           | 2  | 1 | 0 | L3 vertebral body + epidural mass, involvement of C3                          | lymphocyte predominant | IV   | 1 | 0   | 1                                                                                                 | gallium scan |                                |

|    |         |      |    |   |                                                                                                                        |    |   |   |                                                                                                                        |                    |     |   |   |     |        |   |                            |
|----|---------|------|----|---|------------------------------------------------------------------------------------------------------------------------|----|---|---|------------------------------------------------------------------------------------------------------------------------|--------------------|-----|---|---|-----|--------|---|----------------------------|
| 6  | Citow   | 2001 | 54 | F | upper back pain x 2 years, lower extremity weakness / numbness, weight loss                                            | 24 | 1 | 1 | T4-5 vertebral bodies with surrounding soft tissue component, spinal cord compression                                  |                    | 999 | 1 | 0 |     |        | 1 | No PET scan (gallium scan) |
| 7  | Clark   | 1992 | 53 | F | 2 month hx of severe headaches, weakness of right arm/leg, gait difficulties                                           | 2  | 1 | 1 | 4x2cm mass in right cerebellar hemisphere                                                                              | nodular sclerosing |     |   |   |     |        |   | 1                          |
| 8  | Ghedira | 2018 | 40 | M | constipation, numbness of perineum and left foot (x2 weeks), lumbar pain, weight loss, pruritis, night sweats (x 1 yr) | 12 | 1 | 1 | T1, T2, T10, L1, L3, L5, S1 involvement with epidural mass around the conus at L1-L2 and second epidural mass at L3-L4 |                    | 999 | 1 | 1 | 999 | 999    |   |                            |
| 9  | Gupta   | 2009 | 11 | M | pain in lower limbs, back x 1 year, fever, paresthesias x 1 month                                                      | 12 | 1 | 1 | epidural mass, collapse of T7                                                                                          | mixed cellularity  | IV  | 0 | 1 | 8   | ABVD x | 1 |                            |
| 10 | Hashi   | 2018 |    |   |                                                                                                                        |    |   |   |                                                                                                                        |                    |     | 1 |   |     |        |   |                            |

|    |         |      |    |   |                                                                                       |      |   |   |                                                                                          |                    |    |   |        |          |   |
|----|---------|------|----|---|---------------------------------------------------------------------------------------|------|---|---|------------------------------------------------------------------------------------------|--------------------|----|---|--------|----------|---|
| 11 | Hashi   | 2018 |    |   |                                                                                       |      |   |   |                                                                                          |                    |    | 0 |        |          |   |
| 12 | Higgins | 1995 | 46 | M | back pain, constipation, unstead gait, weakness/numbness in lower extremities x 4 mos | 4    | 1 | 1 | intraspinal tumor extending from C5-T8, displacing spinal cord                           | nodular sclerosing |    | 0 | MOPP-1 | ABV x 8  | 1 |
| 13 | Hirmiz  | 2004 | 38 | M | left neck swelling, night sweats x 3 months - presented with GTC seizure              | 3    | 0 | 1 | 2.8cm mass arising from meninges posterior to right frontal lobe - meningeal enhancement | nodular sclerosing | IV |   | 1      | ABVD x 6 | 1 |
| 14 | Johnson | 2000 | 55 | F | 1 week hx of worsening headaches, difficulty walking                                  | 0.25 | 1 | 1 | 2.3 x 3.2 x 3.2 cm mass in posterior fossa                                               | nodular sclerosing |    |   |        |          | 1 |
| 15 | Kasper  | 2012 | 88 | F | upper back pain x several months, difficulty walking, lower extremity weakness        |      | 1 | 1 | epidural lesion from T2-T4 with involvement of T4 vertebral body                         | lymphocyte-deplete |    | 1 | 0      |          | 1 |

|    |           |      |    |   |                                                                                |      |   |   |                                                                                                        |                    |    |   |   |   |                          |               |        |   |
|----|-----------|------|----|---|--------------------------------------------------------------------------------|------|---|---|--------------------------------------------------------------------------------------------------------|--------------------|----|---|---|---|--------------------------|---------------|--------|---|
| 16 | Klein     | 1999 | 54 | M | visual disturbance, headaches x 7 months, right hemiparesis, epileptic seizure | 7    | 1 | 1 | 2 x 1.5 x 1.5cm occipital mass                                                                         | nodular sclerosing |    |   |   |   | 1                        | 5             | COPP x | 1 |
| 17 | Moridaira | 1994 | 56 | M | 1 week history of paraparesis, urinary disturbance                             | 0.25 | 0 | 1 | compression of spinal cord at T10, epidural mass between T8-10, involvement of T9                      |                    |    | 0 |   | 1 | 4                        | C-MOPP/ABVD x |        | 0 |
| 18 | Perry     | 1993 | 30 | F |                                                                                |      |   |   | T5                                                                                                     |                    |    |   |   |   |                          |               |        | 1 |
| 19 | Perry     | 1993 | 42 | F |                                                                                |      |   |   | C8                                                                                                     |                    |    |   |   |   |                          |               |        | 1 |
| 20 | Salomone  | 2021 | 13 | F | back pain, decreased ability to walk x 3 months                                | 3    | 1 | 1 | Epidural mass from T12-L1 with compression / displacement of spinal cord, destruction of T12 vertebrae | nodular sclerosing | IV | 0 | 1 |   | 2x OEPA, 4x DECOP DAC-21 |               | 1      |   |

|    |           |      |    |   |                                                                                                    |   |   |   |                                                                                                                                       |                        |  |   |   |   |               |   |              |
|----|-----------|------|----|---|----------------------------------------------------------------------------------------------------|---|---|---|---------------------------------------------------------------------------------------------------------------------------------------|------------------------|--|---|---|---|---------------|---|--------------|
| 21 | Sama dian | 2009 | 12 | M | low back pain, lower extremity weakness / numbness x 1 month                                       | 1 | 1 | 1 | epidural tumour at L1-L3 - compressed/di splaced dural sac                                                                            | lymphocyte predominant |  | 1 | 1 | 6 | ABVD x        | 1 |              |
| 22 | Toprak    | 1997 | 20 | M | 5 month hx of back pain radiating down left leg                                                    | 5 | 1 | 0 | bony lesions with the sacrum, lumbar epidural mass between L4 and S1 - extension through the spinal foramina towards the spinal canal | nodular sclerosing     |  | 0 | 1 | 1 | c-MOPP-ABVD   |   |              |
| 23 | Toto      | 2016 | 12 | F | neck pain x 1 month, radiating down arms, developed urinary retention, parasthesias in extremities | 1 | 1 | 1 | intraspinal mass in lower cervical region C7-T1, cord compression C3-C7, multiple vertebral body lesions                              | classical              |  | 1 | 1 | 1 | not specified | 1 |              |
| 24 | Uehara    | 2013 | 28 | F | 5 months upper back pain, weakness in lower extremities,                                           | 5 | 1 | 1 | T1-T3 epidural mass, soft-tissue swelling, spinal cord compression,                                                                   | classical              |  | 1 | 1 | 1 | 12 x ABVD     | 1 | gallium scan |

|  |  |  |  |                       |  |  |                                                              |  |  |  |  |  |  |  |  |
|--|--|--|--|-----------------------|--|--|--------------------------------------------------------------|--|--|--|--|--|--|--|--|
|  |  |  |  | numbness x<br>1 month |  |  | osteolytic<br>changes of<br>vertebral<br>bodies in T2,<br>T3 |  |  |  |  |  |  |  |  |
|--|--|--|--|-----------------------|--|--|--------------------------------------------------------------|--|--|--|--|--|--|--|--|
